# Supplementary material
Source: PubMed Central journal article supplement (PMC6873702)
Supplement: NIHMS966394-supplement-Supplemental_Tables.pdf [file NIHMS966394-supplement-Supplemental_Tables.pdf]

## **Supplementary Material**

Table S1: List of covariates included in the propensity score model

Table S2: Variables selected for 90-day readmission multivariable logistic regression model

Table S3: Variables selected for the long-term mortality Cox proportional hazards model

Table S4: Baseline Characteristics of patients in the post-discharge outcomes analyses

**Table S1:** List of covariates included in the propensity score model

- Glomerular Filtration Rate (CKD-EPI)
- Age
- Gender
- Race (White, African American or Black, Asian)
- Admission source (Emergency room, transfer, other)
- Atrial Fibrillation History
- Pre-PCI LV ejection fraction <40%
- Current/Recent smoker (within 1 year)
- Hypertension
- Dyslipidemia
- Family history of Premature CAD
- Prior MI
- Prior HF
- Prior Valve Surgery/Procedure
- Prior PCI
- Prior CABG
- Weight
- Height
- Dialysis
- Peripheral Arterial Disease
- Chronic Lung Disease
- Diabetes Mellitus
- <sup>1</sup>CAD Presentation (STEMI, NSTEMI, UA, SA, non-ischemic, no symptoms)
- Heart Failure within 2 weeks
- Cardiomyopathy of LV systolic dysfunction
- Cardiogenic shock within 24 hours
- Cardiac arrest within 24 hours
- PCI Status
- Cardiogenic Shock at the start of PCI
- PCI indication
- Pre-Procedure hemoglobin

<sup>1</sup>Exact matching required for CAD presentation

*Abbreviations: CAD = coronary artery disease; NSTEMI = non-ST-segment elevation myocardial infarction; PCI = percutaneous coronary intervention; STEMI = ST-segment elevation myocardial infarction.*

**Table S2:** Variables selected for 90-day readmission multivariable logistic regression model

- Glomerular filtration rate
- Gender
- African American/Black race
- Hypertension
- Dyslipidemia
- Prior heart failure
- Prior peripheral arterial disease
- Chronic lung disease
- Diabetes Mellitus
- Admission source (Emergency room, transfer, other)
- Heart failure within prior 2 weeks
- Pre-procedure hemoglobin

**Table S3:** Variables selected for the long-term mortality Cox proportional hazards model

- Gender
- Dyslipidemia
- Prior peripheral arterial disease
- Chronic Lung disease
- Admission source (Emergency room, transfer, other)
- Heart failure within 2 weeks
- PCI status
- Pre-procedure hemoglobin
- Coronary artery disease presentation (STEMI, NSTEMI, UA, SA, not ischemic, no symptoms)

**Table S4:** Baseline characteristics of patients linked to Medicare claims data.

| <b>Characteristics</b>                                  | <b>No History of TIA/CVA<br/>(n=12,128)</b> | <b>History of TIA/CVA<br/>(n=1,933)</b> | <b>p-value</b> |
|---------------------------------------------------------|---------------------------------------------|-----------------------------------------|----------------|
| Age                                                     | 72.19 ± 9.60                                | 73.05 ± 9.71                            | p < 0.001      |
| Female Sex                                              | 4,791/12,128 (39.5%)                        | 876/1,933 (45.3%)                       | p < 0.001      |
| White Race                                              | 10,717/12,128 (88.4%)                       | 1,646/1,933 (85.2%)                     | p < 0.001      |
| Black Race                                              | 995/12,128 (8.2%)                           | 239/1,933 (12.4%)                       | p < 0.001      |
| <b>Comorbidities</b>                                    |                                             |                                         |                |
| Current/Recent Smoker (w/in 1 year)                     | 2,369/12,126 (19.5%)                        | 365/1,933 (18.9%)                       | p = 0.500      |
| Hypertension                                            | 10,822/12,127 (89.2%)                       | 1,830/1,933 (94.7%)                     | p < 0.001      |
| Dyslipidemia                                            | 10,173/12,118 (83.9%)                       | 1,717/1,933 (88.8%)                     | p < 0.001      |
| Family History of Premature CAD                         | 1,592/12,126 (13.1%)                        | 243/1,933 (12.6%)                       | p = 0.499      |
| Prior MI                                                | 3,882/12,125 (32.0%)                        | 815/1,933 (42.2%)                       | p < 0.001      |
| Prior Heart Failure                                     | 2,056/12,124 (17.0%)                        | 540/1,933 (27.9%)                       | p < 0.001      |
| Prior Valve Surgery/Procedure                           | 247/12,123 (2.0%)                           | 61/1,933 (3.2%)                         | p = 0.002      |
| Prior PCI                                               | 5,460/12,126 (45.0%)                        | 957/1,933 (49.5%)                       | p < 0.001      |
| Prior CABG                                              | 2,475/12,127 (20.4%)                        | 476/1,933 (24.6%)                       | p < 0.001      |
| Height                                                  | 169.62 ± 10.69                              | 168.24 ± 10.71                          | p < 0.001      |
| Weight                                                  | 86.74 ± 21.26                               | 84.95 ± 19.83                           | p < 0.001      |
| Cerebrovascular Disease                                 | 989/12,126 (8.2%)                           | 1,840/1,933 (95.2%)                     | p < 0.001      |
| Peripheral Arterial Disease                             | 2,229/12,126 (18.4%)                        | 575/1,933 (29.7%)                       | p < 0.001      |
| Chronic Lung Disease                                    | 2,701/12,126 (22.3%)                        | 570/1,933 (29.5%)                       | p < 0.001      |
| Diabetes Mellitus                                       | 4,864/12,127 (40.1%)                        | 962/1,933 (49.8%)                       | p < 0.001      |
| Heart Failure w/in 2 Weeks                              | 1,466/12,127 (12.1%)                        | 321/1,932 (16.6%)                       | p < 0.001      |
| Cardiomyopathy or Left Ventricular Systolic Dysfunction | 1,265/12,127 (10.4%)                        | 220/1,932 (11.4%)                       | p = 0.204      |
| <b>Coronary Artery Disease Presentation</b>             |                                             |                                         |                |
| No symptom, no angina                                   | 394/12,124 (3.2%)                           | 63/1,932 (3.3%)                         | p = 0.980      |
| Symptom unlikely to be ischemic                         | 293/12,124 (2.4%)                           | 41/1,932 (2.1%)                         | p = 0.430      |
| Stable angina                                           | 1,170/12,124 (9.7%)                         | 188/1,932 (9.7%)                        | p = 0.911      |
| Unstable angina                                         | 5,803/12,124 (47.9%)                        | 895/1,932 (46.3%)                       | p = 0.208      |
| Non-STEMI                                               | 2,729/12,124 (22.5%)                        | 508/1,932 (26.3%)                       | p < 0.001      |
| ST-Elevation MI (STEMI) or equivalent                   | 1,735/12,124 (14.3%)                        | 237/1,932 (12.3%)                       | p = 0.016      |
| <b>Pre-procedural and procedural variables</b>          |                                             |                                         |                |
| Cardiogenic Shock w/in 24 Hours                         | 204/12,127 (1.7%)                           | 39/1,932 (2.0%)                         | p = 0.292      |
| Cardiac Arrest w/in 24 Hours                            | 167/12,126 (1.4%)                           | 28/1,932 (1.4%)                         | p = 0.801      |
| IABP                                                    | 254/12,123 (2.1%)                           | 39/1,933 (2.0%)                         | p = 0.825      |
| Other Mechanical Ventricular Support                    | 102/12,118 (0.8%)                           | 19/1,933 (1.0%)                         | p = 0.533      |
| Arterial Access Site: Femoral                           | 8,877/12,127 (73.2%)                        | 1,452/1,933 (75.1%)                     | p = 0.076      |
| Arterial Access Site: Radial                            | 3,216/12,127 (26.5%)                        | 471/1,933 (24.4%)                       | p = 0.046      |
| Pre-PCI Left Ventricular Ejection Fraction              | 52.71 ± 12.78                               | 51.44 ± 13.57                           | p < 0.001      |
| Cardiogenic Shock at Start of PCI                       | 264/12,123 (2.2%)                           | 40/1,932 (2.1%)                         | p = 0.763      |
| Pre-Procedure Creatinine                                | 1.17 ± 0.96                                 | 1.35 ± 1.34                             | p < 0.001      |
| Pre-Procedure Hemoglobin                                | 13.24 ± 1.83                                | 12.73 ± 1.93                            | p < 0.001      |

All percentages represent frequencies. Where nominal values are used, they are presented as mean ± standard deviation.

*Non-STEMI=Non ST-elevation myocardial infarction; STEMI=ST-elevation myocardial infarction; PCI=percutaneous coronary intervention.*
